# Come together: bioelectric healing-on-a-chip

Tom J. Zajdel<sup>a</sup>, Gawoon Shim<sup>a</sup>, Daniel J. Cohen<sup>\*a</sup>

<sup>a</sup> *Department of Mechanical & Aerospace Engineering, Princeton University, Princeton, NJ, United States of America*

\* *Corresponding author: [danielcohen@princeton.edu](mailto:danielcohen@princeton.edu)*

## Abstract

There is a growing interest in bioelectric wound treatment and electrotaxis, the process by which cells detect an electric field and orient their migration along its direction, has emerged as a potential cornerstone of the endogenous wound healing response. Despite recognition of the importance of electrotaxis in wound healing, no experimental system to date demonstrates that the actual closing of a wound can be accelerated solely by the electrotaxis response itself, and *in vivo* systems are too complex to resolve cell migration from other healing stages such as proliferation and inflammation. This uncertainty has led to a lack of standardization between stimulation methods, model systems, and electrode technology required for device development. In this paper, we present a ‘healing-on-chip’ approach that is a standardized, low-cost, model for investigating electrically accelerated wound healing. Our device provides the first convergent field geometry used in a stimulation device. We validate this device by using electrical stimulation to close a 1.5 mm gap between two large (30 mm<sup>2</sup>) primary skin keratinocyte layers to double the rate of healing over an unstimulated tissue. This proves that convergent electrotaxis is both possible and can accelerate healing, and offers a new ‘healing-on-a-chip’ platform to explore future bioelectric interfaces.

## Introduction

Since du Bois-Reymond first characterized the naturally occurring ‘wound current’ nearly two centuries ago (1), there has been significant interest in applying external electrical stimulation to improve wound healing (2–4). The potential for this approach is becoming increasingly apparent—for instance, numerous, recent, *in vivo* studies show some improvement in skin healing in animal models upon electric field stimulation (5–10), while *in vitro* assays have demonstrated control of cells and simple tissues using spatially programmed electric cues (11–13). Further, given the increasing prevalence and healthcare burden of wound treatments (14,15), new technologies to expedite and improve wound care are sorely needed. However, despite these and other studies over the past several decades, the few extant commercial products have demonstrated mixed results (16–19), and bioelectric wound therapy is far from the standard of care. This discrepancy is due to broad gaps in both technology development and biological knowledge describing how electrical stimulation may act to improve wound healing. Technologically, optimum stimulation parameters

37 for field strength, biointerface design, and current delivery mode remain unclear (20,21).  
38 Biologically, there is uncertainty about how the key wound healing mechanisms--cell migration,  
39 proliferation, and inflammation—are affected by electric stimulation (2). This uncertainty has  
40 resulted in a lack of standardization in stimulation schemes, model systems, and technology that  
41 can all lead to issues of reproducibility and long design iterations time that have slowed progress  
42 (22–24).

43  
44 Here, we begin to address this problem by integrating a popular technical approach used in other  
45 branches of biotechnology—‘organ-on-a-chip’ systems—to reduce the complexity of biomedical  
46 problems to something both tractable and eventually translatable. Organ-on-a-chip (OoC)  
47 platforms are *in vitro* model systems that capture a specific and critical physiological behavior of  
48 the *in vivo* system in a standardized, rapid, lower-cost *in vitro* model. To date, OoCs have clearly  
49 proven their value in other fields by aiding discoveries and treatments for lung, gut, and vascular  
50 pathologies (25–27). Here, we use an OoC approach to integrate a ‘healing-on-a-chip’ platform  
51 with a custom electrobioreactor designed from the ground up to investigate electrically accelerated  
52 wound healing.

53  
54 While there are many effects that applied electrical stimulation may have on tissue growth and  
55 healing, the best-characterized is *electrotaxis*—the directed motion of cells in response to an  
56 electric current. Electrotaxis is seen in over 20 cell types across multiple organisms where cells  
57 sense and track electrochemical potential gradients (~1 V/cm) that emerge during development  
58 and injury healing (28–30). The mechanism of detection is thought to be electrophoresis of charged  
59 membrane-bound receptors in the presence of an electric field, resulting in an asymmetric  
60 distribution of these proteins that triggers downstream signaling of the cell migration machinery  
61 (31). *In vivo*, these fields result in the center of a skin wound being negatively polarized relative  
62 to the periphery of the wound (32,33). Direct current fields are analogous to fields *in vivo* (34), in  
63 contrast to the pulsed DC or AC stimulation used in many *in vivo* studies (5), and are sufficient to  
64 induce the electrotaxis response. However, electrotaxis has primarily been studied in isolated  
65 single cells to elucidate the molecular biology of the process, and at present there is no study, either  
66 *in vitro* or *in vivo* that conclusively indicates that electrotaxis itself can accelerate wound closure.  
67 This gap stems from the technological limitations of current devices used to study electrotaxis.

68 Nearly all devices use a single electrode pair to apply a uniform, unidirectional field across  
69 tissues—such a field would cause one side of a wound to close and the other side to worsen. *In*  
70 *vivo*, the wound field converges on the center of a wound, so a new device design is required to  
71 capture this characteristic. In addition to this stimulation limitation, most studies and devices do  
72 not generalize well to macroscale tissues and wounds since precise tissues with reproducible,  
73 millimetric wounds must be grown inside the electrobioreactor. Finally, macroscale cell migration  
74 requires stable electrical stimulation over many hours, and the common, bleach-based electrode  
75 preparation process is insufficient for long-term stimulation (>4 hours). An ideal bioelectric  
76 ‘wound-on-a-chip’ platform should address these issues.

77  
78 Here we build on our prior work (11,12) to create a new electrobioreactor to study healing in a  
79 macroscale skin-on-a-chip model using primary mouse skin monolayers which migrate toward  
80 the cathode when stimulated (Fig. 1), and use electrical stimulation to accelerate closure of 1.5  
81 mm large model skin wounds by at least 2X over unstimulated skin layers (Figs. 2, 3). To  
82 accomplish this, we developed new electrotaxis infrastructure specifically designed for the  
83 constraints of wound healing, delivering a sustained converging electric field to a tissue (Fig. 1).  
84 With this device, we were able to engineer and stimulate the largest tissues yet tested with  
85 electrotaxis (30 mm<sup>2</sup>) for 12 hours, while also exploring the consequences of overstimulation.

86

## 87 **Results**

88 Our new electrobioreactor significantly departs from extant electrotaxis systems by generating an  
89 electric field that converges at the center of model wounds, and functions as follows. The device  
90 consists of an acrylic insert clamped to a standard tissue culture dish, holding electrodes and  
91 agarose salt bridges in position (Fig. 1A, see ESI Methods for fabrication details). Three  
92 chloridized silver stimulation electrodes (anodes at left and right, cathode at center) are isolated  
93 from each other in separate saline reservoirs and electrical contact with the culture media is  
94 provided by 4% agarose w/v salt bridges cast inside the insert, one per reservoir (Fig. 1B). The  
95 ~500 μm thin, laser-milled, agarose bridge serves as a central cathode and is aligned directly  
96 over the wound site (Fig. 1C, see ‘\*’). The result is a stable, uniform field that converges upon  
97 the central electrode as confirmed by simulation (Fig. 1D,E). To reliably generate reproducible  
98 tissues and linear wounds, we use a silicone stencil templating method (12,35) to prepare

99 confluent monolayers the evening before an experiment. We then assemble the electrobioreactor  
100 over these tissues prior to imaging. For these experiments, we use layers of keratinocytes from  
101 primary skin cultured under basal conditions optimized for electrotaxis (11). After the tissues  
102 have grown, the stencils are removed, and the device is clamped over the cells, aligned such that  
103 that the central slit electrode is in the gap between cells (Fig. 1E). Then, a computer-controlled  
104 source meter (Keithley 2450) is connected to each pair of electrodes (left-center and right-  
105 center), with both sources sharing the central cathode, to supply an electric current. The field  
106 within the chamber is continuously monitored by a digital oscilloscope and the current output of  
107 each source meter is adjusted via closed-loop control to maintain a constant 2 V/cm field  
108 strength directed toward the central cathode. We specifically chose this field strength as it has  
109 previously been validated and was chosen to amplify the approximate field strength experienced  
110 *in vivo* (28). To extend cathode lifetime, only one source was active at a time, alternating  
111 between left-center and right-center stimulation every 30 seconds. Oxygen delivery and waste  
112 management are handled by perfusing fresh media through the bioreactor at 2 mL/h, turning over  
113 the chamber volume ~11 times per hour. The resulting system provides a robust convergent field  
114 to viable cells.

115  
116 Stable DC stimulation and cell viability require that the electrodes remain intact throughout an  
117 entire experiment, so optimization of electrode chemistry is an important consideration. Virtually  
118 all DC electrotaxis chambers use an anode and a cathode to inject Faradaic current through a  
119 sample, using combinations of salt bridges, media perfusion, and heavy buffering to prevent the  
120 buildup of toxic electrochemical byproducts or harmful pH changes due to electrolysis at the  
121 electrodes (20,36,37). Because the current used in our device is moderate (~6-10 mA) and the  
122 1.5 mm gap between tissues is relatively large, the central cathode must be able to sink current  
123 for an extended period to induce tissue convergence, ideally 12 hours or more. To support this,  
124 our system uses electrically chloridized silver foil as electrodes, which degrades at the cathode  
125 into ionic silver and chloride during stimulation. This reaction is more favorable than the

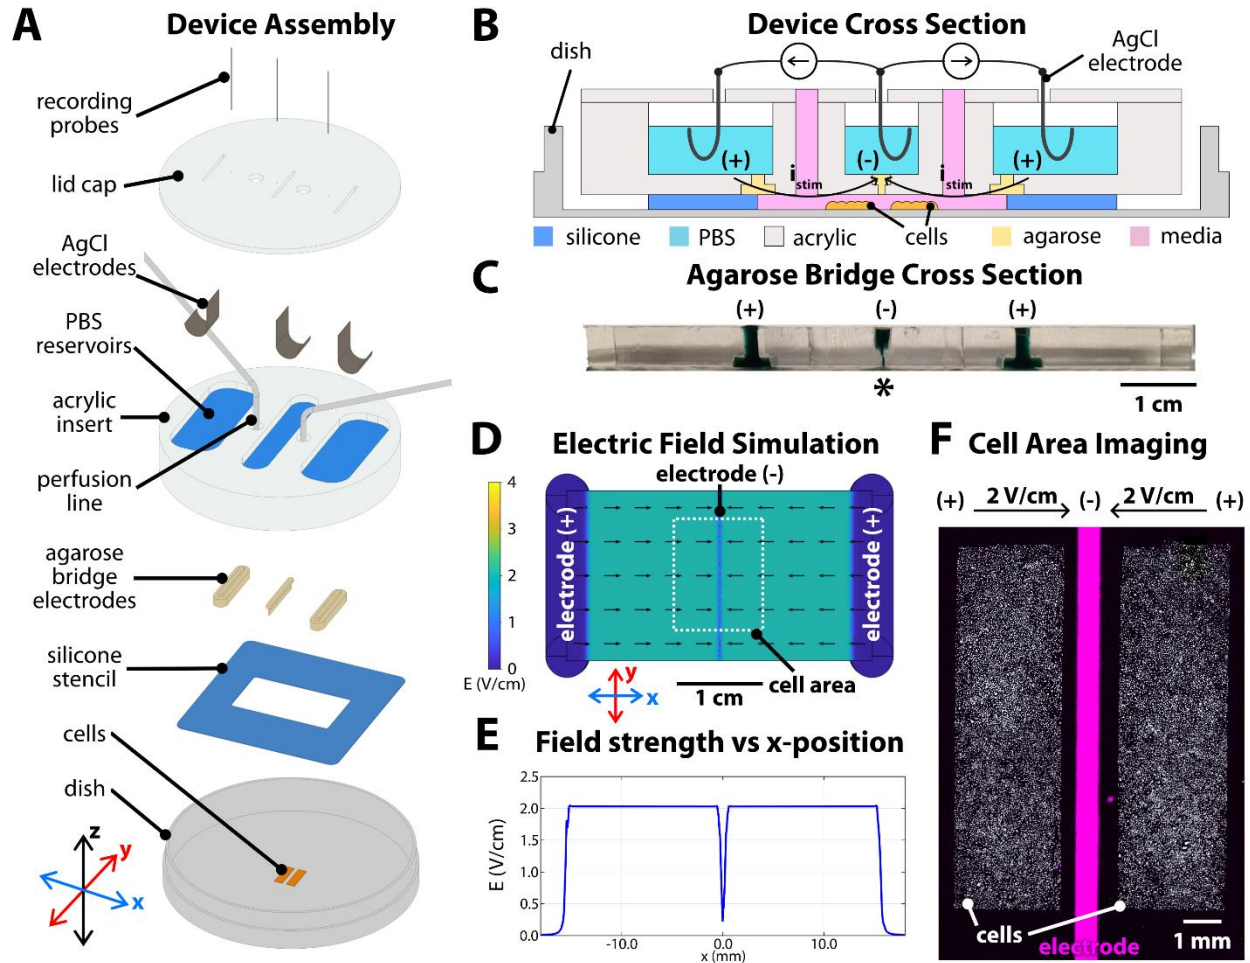

**Fig. 1: Convergent field stimulation device.** (A) Layer-based assembly of the bioreactor onto a tissue culture dish. Cells are patterned in the center of the dish, then a 250  $\mu\text{m}$ -thick silicone stencil is placed to define the stimulation area and height. Agarose bridges are cast inside an acrylic insert, then clamped into the dish and against the silicone stencil. The reservoirs on the topside of the acrylic insert are filled with phosphate-buffered saline (PBS). Chloridized silver electrodes and titanium wire recording probes are inserted in each reservoir, all held in place by a lid cap. (B) Device cross-section sketch and (C) photograph of the sectioned agarose bridges stained with green food coloring for contrast. The narrow cathode is labeled with '\*'. (D) Numeric simulation of the electric field in the device, showing constant 2 V/cm field strength converging toward the center, with a steep drop-off in strength starting  $\pm 500 \mu\text{m}$  from the center. (E) Simulated field strength versus x-position in the device. (F) Microscope capture of the central area of the assembled device, showing the central electrode 500  $\mu\text{m}$  wide positioned between the two tissues. The cells (white) were labeled with a Cy5 lipophilic dye and the outline of the central electrode was visualized with a DAPI filter set ( $\lambda_{\text{ex}}/\lambda_{\text{em}}$  358/461 nm) and filled via post-processing in ImageJ (magenta).

126 hydrolysis cathodal half-reaction, which evolves hydrogen gas from the solution and increases  
 127 pH (37). This allows for safe stimulation until AgCl is depleted at the cathode, when evolution of  
 128  $\text{H}_2$  then becomes favorable and pH increases rapidly, which can cause cytotoxicity. Therefore,  
 129 sufficient chloridization of the silver foil is paramount for extended electrode lifetime. We  
 130 compared our chloridization method with bleach immersion, another technique commonly used  
 131 to chloridize silver. We performed repeated cyclic voltammetry to compare electrode

132 preparations and found that our method of electroplating silver chloride resulted in more stable  
133 cathodes (see ESI, Fig. S1). Our combined approach of robust silver chloridization, agarose  
134 diffusion barriers to prevent ionic silver reaching the tissue, and media perfusion integrates  
135 numerous best practices to maximize cell viability during stimulation in our device, allowing for  
136 extended wound healing experiments.

137

138 To evaluate this platform for *in vitro* healing, we patterned two 10 x 3 mm tissues spaced 1.5 mm  
139 apart with the central cathode aligned over the wound center (Fig. 1F). The acrylic outline of the  
140 central cathode slit fluoresces weakly when imaged using a standard DAPI filter set, so the  
141 alignment between the central cathode and the tissues could be tuned and verified. We then  
142 applied convergent electrical stimulation over 12 hours following a 30-minute control period  
143 without field, with striking results (Fig. 2, Video S1). In the non-stimulated control case, cell  
144 proliferation and migration lead to the slow expansion of tissues and gradual, but incomplete  
145 closure of the wound over 12 hours (~50% closure, N=3). However, convergent bioelectric  
146 stimulation led to complete closure between 11-12 h (N=3). More specifically, the edge  
147 migration speed was twice as fast in the stimulated case as in the control, measuring  $29.4 \pm 3.3$   
148  $\mu\text{m/h}$  and  $62.2 \pm 8.1 \mu\text{m/h}$  for the control and stimulated cases, respectively. To conclusively  
149 attribute this effect to electrical stimulation rather than temperature effects (Joule heating has  
150 been linked to increased migration speeds in prior studies (31,38)) we monitored the device  
151 temperature during stimulation (Fig. S2). The steady state temperature rose from 37 °C to 38 °C,  
152 and this 3% increase is unlikely to account for the 100+% increase in migration speed during  
153 stimulation. We hypothesize that perfusion and media turn over helps to exchange heat and  
154 mitigate any effects from Joule heating. Taken together, this is the first demonstration of  
155 convergent field stimulation accelerating *in vitro* wound healing, and the results prove that  
156 electrotaxis alone is sufficient for this closure.

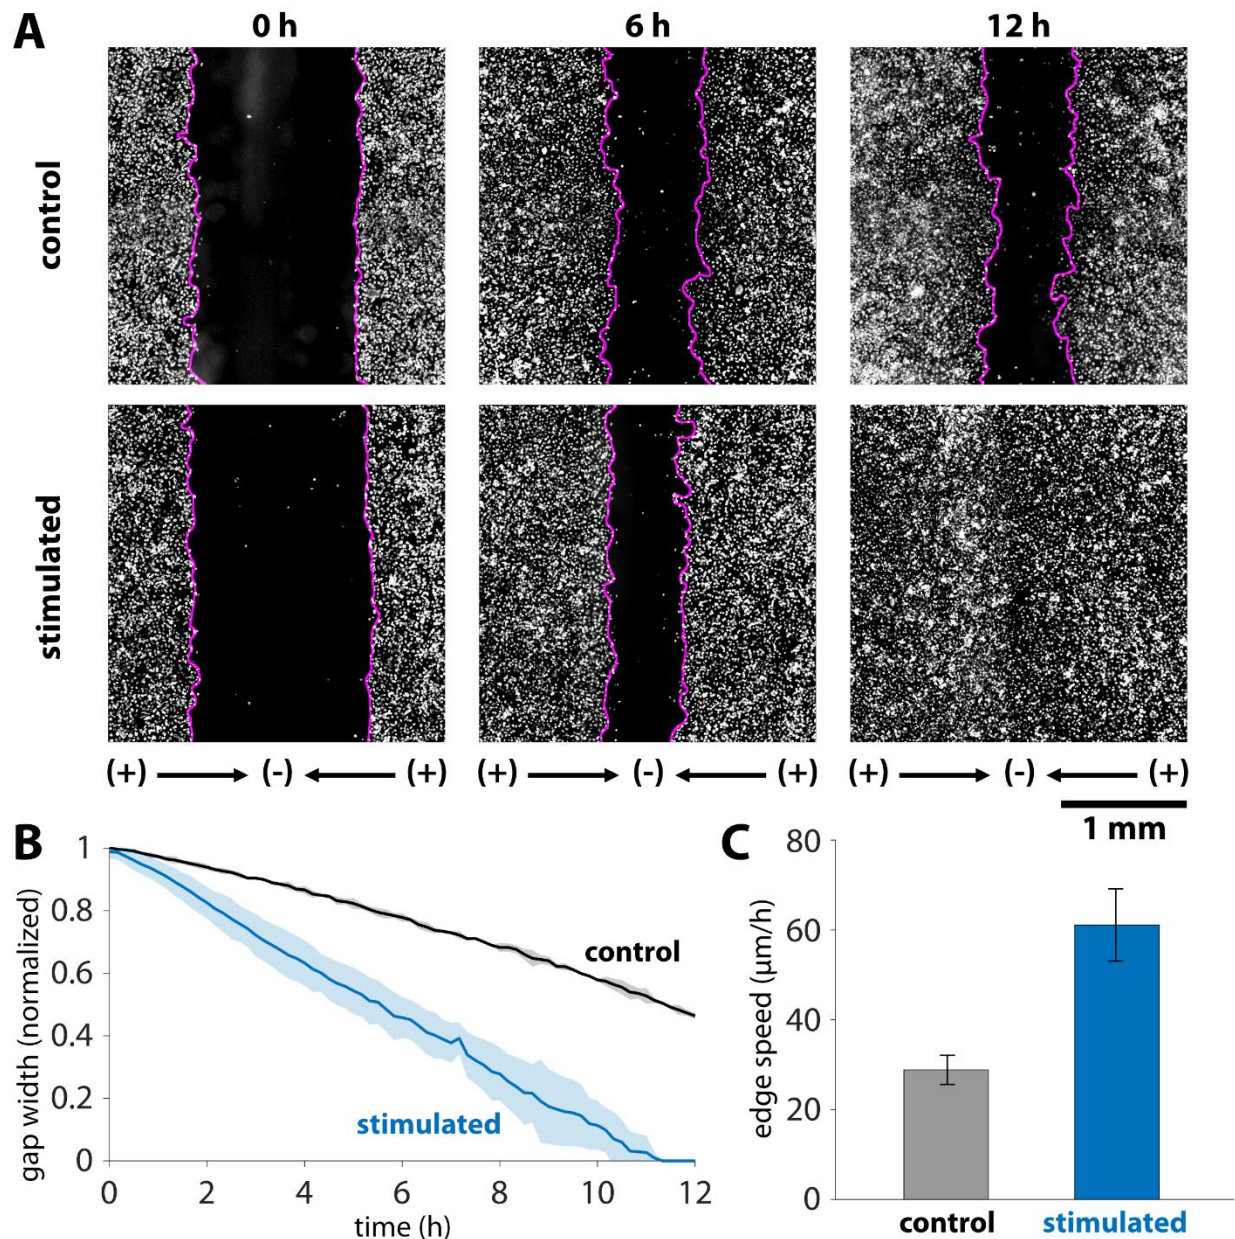

**Fig. 2. Dynamics of accelerated wound closure of keratinocyte monolayers.** (A) Timepoint comparison of stimulation versus control for keratinocytes labeled with a Cy5 cytoplasmic dye. Gap boundaries are demarked by magenta lines. Initial gap between tissues was 1.5 mm, and this gap closed by 12 hours in the stimulated case, while roughly 50% of the gap remained in the control case. (B) Gap closure normalized to the initial gap width for  $N = 3$  tissues in each condition. Shaded region represents standard deviation. (C) Edge expansion speeds averaged over an 8 h period. The average edge expansion was  $29.4 \pm 3.3 \mu\text{m}/\text{h}$  and  $62.24 \pm 8.1 \mu\text{m}/\text{h}$  for the control and stimulated cases, respectively.  $N = 6$  edges in each case and error bars represent standard deviation.

157 To better characterize device performance and its effects on large scale tissue growth and  
 158 motion, we performed particle image velocimetry (PIV) on each tissue. Representative  
 159 horizontal velocity kymographs for both the control and convergent stimulation cases are shown

160 in Fig. 3 (compare with Video S1). To provide context of spatial dynamics within a given tissue,  
161 we show representative heatmaps of horizontal velocity and line integral convolution (LIC)  
162 migration maps to visualize the overall flow of cellular motion at 4 hours after the onset of  
163 stimulation (steady state). Throughout the control tissue (Figs. 3A-C), there is little net outwards  
164 motion, except for slow expansion at the edges. Disorder is apparent in the velocity and  
165 migration maps of the control tissues, which lack large regions of coordinated movement, as  
166 expected for non-stimulated tissues (Figs. 3B,C). In contrast, bioelectric stimulation resulted in  
167 nearly uniformly high-speed motion throughout the tissue, converging on the gap within 15  
168 minutes of the field turning on, as visualized in the velocity and migration maps (Figs. 3D-F).  
169 The large number of parallel streaklines along the stimulation direction in the migration map  
170 demonstrates highly coordinated motion across the tissue in alignment with the stimulus (Figs.  
171 3F). These visualizations reveal that the electric field acts a global migration cue across a large  
172 area, confirming that cells experience a highly uniform field as predicted by simulation (Fig.  
173 1D,E).

174  
175 Having demonstrated that the *in vitro* healing process can be electrically accelerated overall, we  
176 next characterized cellular responses specifically during the final stages of wound closure.  
177 Unlike traditional electrotaxis chambers where the electrodes are significantly distal to the tissue  
178 to ensure a uniform field, our healing-on-a-chip device requires a central electrode to focus cell  
179 migration into the wound zone. Since the central electrode has a finite width (~500  $\mu\text{m}$  here) that  
180 is smaller than the wound, this means that tissues will eventually pass underneath the electrode  
181 and enter the ‘electrode shadow’ during the final stages of healing and convergence. Any  
182 discrete electrode produces field non-uniformities close to its surface, so as cells enter the  
183 electrode shadow, they will experience a very different field than out in the fully developed  
184 zones far from the center. Our simulation predicts a sharp decrease in electric field strength that  
185 begins about 500  $\mu\text{m}$  on either side of the central cathode above the convergence region (Fig.  
186 4A). We quantified the actual effects of the central field singularity by stimulating closed tissues  
187 for 6 hours and using a live nuclear dye to track cells in that central zone (Video S2). We  
188 averaged PIV across the region surrounding the closure zone over the stimulation period (Fig.  
189 4B, asterisks and error bars) and fit a sigmoid function to the data (Fig. 4B, inset) showing that  
190 there is a strong, steady-state response far from the central electrode that steadily weakens as



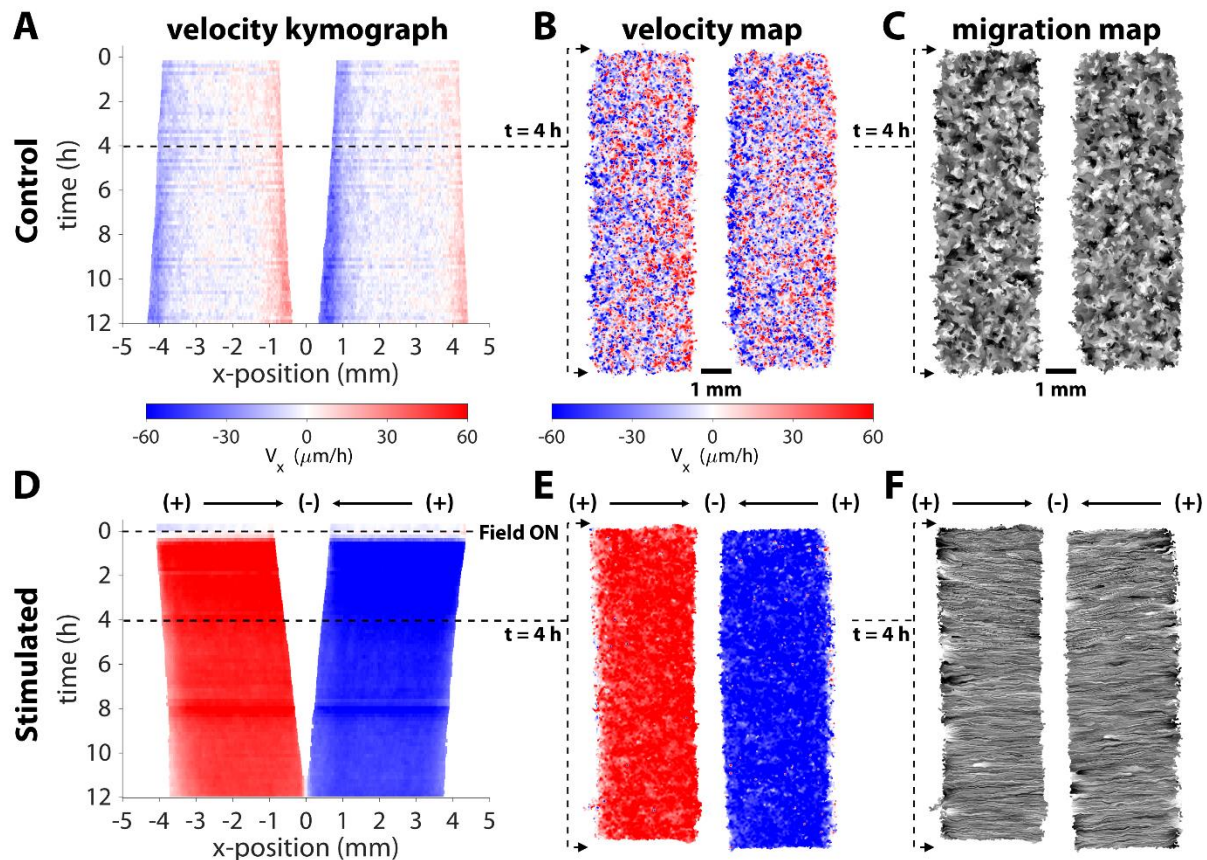

**Fig. 3. Convergent stimulation results in coherent migration response towards the center.** Representative kymograph of  $V_x$  averaged across x-position in a control (A) and stimulated (D) tissue pair. The control tissues expand uniformly outwards, while the stimulated tissues converge towards the cathode with uniformly high speed across the tissue area ( $\sim 60 \mu\text{m/h}$  directed towards the gap). Horizontal velocity maps (B,E) and migration maps (C,F) in representative tissue pairs.

191 cells approach the central electrode and enter the electrode shadow (Fig. 4, dashed blue line;  
 192 magenta zone shows electrode shadow). While this local weakening of the electrotactic response  
 193 closely resembled the trend in our simulations, cells nonetheless continued to directionally  
 194 migrate deep into the electrode shadow zone, only to dropping to  $<50\%$  of the steady state  
 195 velocity once cells were  $\sim 100 \mu\text{m}$  off the electrode midline. These data show that the effective  
 196 electrode size is smaller than its physical,  $500 \mu\text{m}$  width (Fig. 4B, compare dotted black  
 197 boundaries to electrode boundaries). This means that even relatively large electrodes can still  
 198 promote last-mile healing.

199

200 Critically, we also observed potential consequences to continued electrical stimulation after a  
 201 wound had closed. As has been noted previously (39), electrotaxis appears to override basic  
 202 cellular safety mechanisms, such as contact inhibition, meaning that cells will continue trying to

203 directionally migrate as long as stimulation is active. In our wound healing model, this meant  
204 that stimulating after a tissue had closed would continue to drive cell migration towards where  
205 the center of the wound had previously been. This inevitably caused an increase in local cell  
206 density, and we measured a >2X increase (from 750 to 1600 cells/mm<sup>2</sup>) in cell density under the  
207 electrode shadow relative to density distal to the central electrode (Fig. 4C-E), showing there is  
208 potential for over-densification of cells driven by post-healing stimulation. Comparing individual  
209 cell trajectories within the central zone confirmed that cells within the electrode shadow  
210 translated horizontally a lower distance than those that were farther away (Fig. 4F,G). This  
211 reduction in overall translation extended, in a graded fashion, outwards 500  $\mu$ m from the center  
212 in either direction, consistent with the reduction of speed cells experience as they enter the  
213 electrode shadow. Nevertheless, there is net migration towards the center, even for cells that  
214 were initially positioned under the electrode, suggesting again that the electrode's influence  
215 extends underneath its width despite significant weakening of the effective field strength.

216

217 We suggest two reasons that the 'effective electrode' size would be smaller than its physical size.  
218 First, the threshold field strength that elicits an electrotaxis response is lower than the 2 V/cm we  
219 target in stimulation. As the field strength rolls off, it is still 'therapeutic' for some time, given  
220 that physiological field strengths are on the order of 1 V/cm (28). Second, the monolayers carry  
221 some memory of the electrotaxis response that continues to influence their responses after the  
222 stimulus changes (11). Keratinocytes polarize in response to the field stimulus, and this  
223 polarization takes time to decay once a stimulus is no longer detected. This could lead to cells  
224 effectively coasting, unguided, during the last gap before tissue closure.

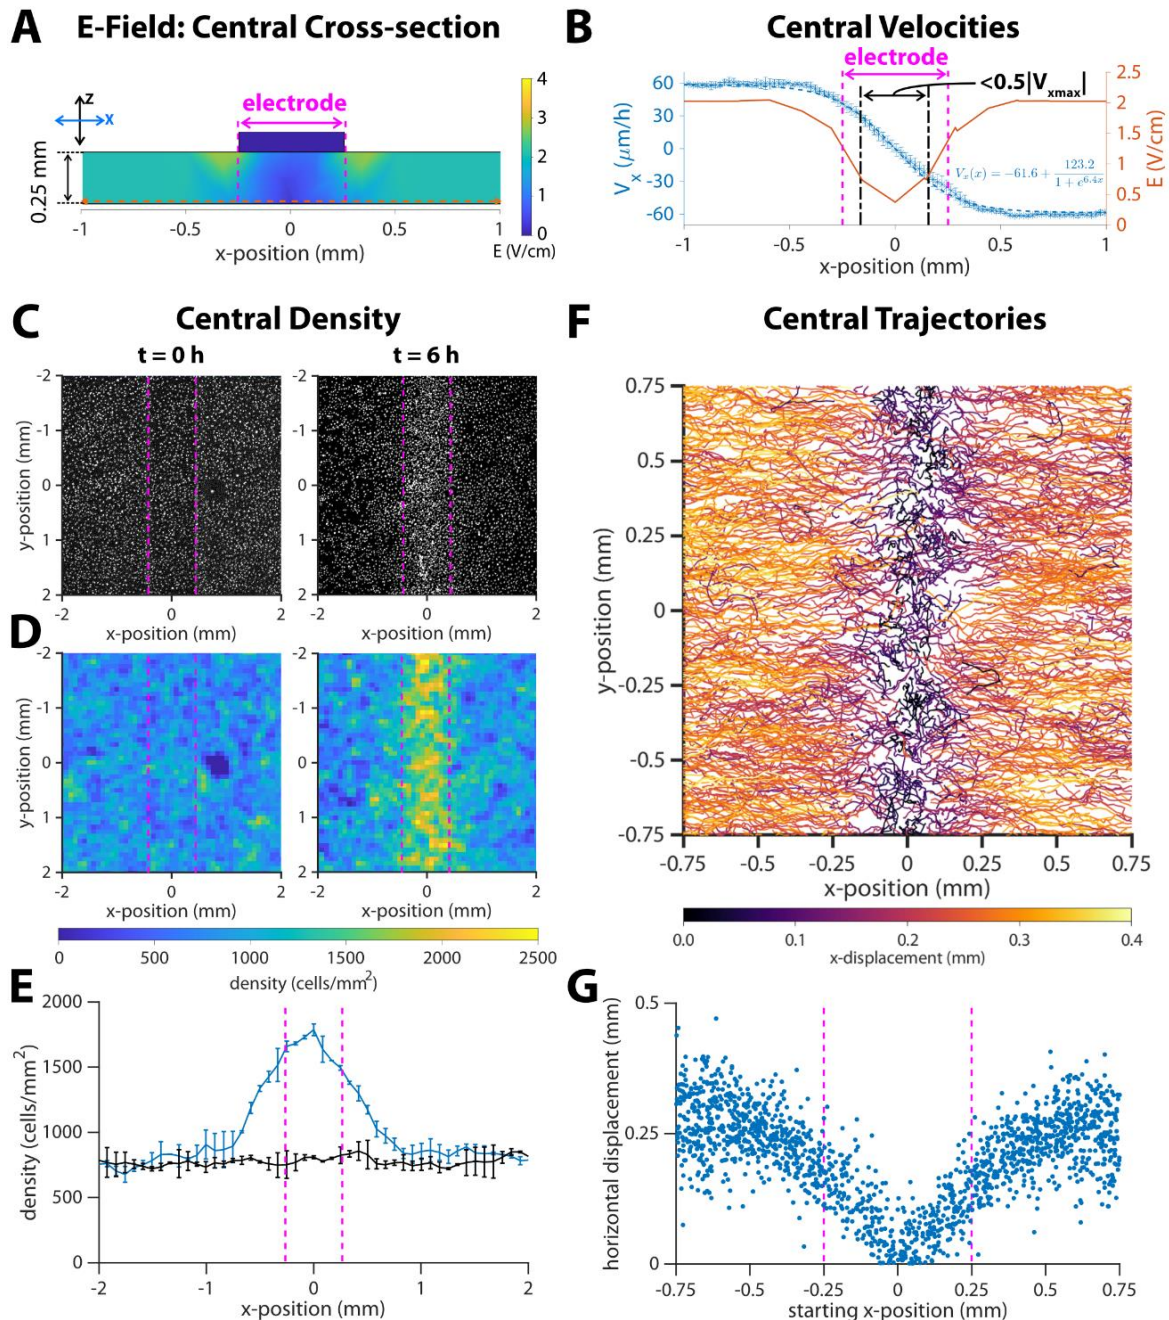

**Fig. 4. Response of migrating cells near the center of a closed tissue.** Dotted vertical magenta lines indicate approximate cathode boundaries in each respective graph. (A) Numeric simulation results for the electric field of the channel in cross section. The horizontal dotted line is the section of the electric field plotted in the next panel. (B) Average horizontal velocity plotted as blue \*'s with error bars representing standard deviation (N = 2). The dashed blue line indicates a least-squares fit of a sigmoid function to the data, and the formula for this fit is inset in the lower right quadrant of the plot. The region where the horizontal velocity's magnitude drops to  $< 50\%$  of the steady state value is marked by dot-dash black lines. Predicted strength from numeric simulation (reproduced from Fig. 1E) is plotted as a red solid line. (C) DAPI images of cell nuclei and (D) density maps for tissues at the onset of stimulation ( $t = 0$  h) and after six hours of stimulation ( $t = 6$  h). (E) Average cell density versus x-position, where  $x = 0$  is the center of the cathode. Error bars represent standard deviation (N = 2). (F) Montage of 6-hour trajectories of individual cells in proximity with the center. Each track is colored by net x-displacement. (G) Total horizontal displacement of cell versus its starting x-position relative to the center of the cathode at  $x = 0$ .

## 225 **Discussion & Conclusion**

226 Overall, we present a bioelectric, healing-on-a-chip (HoC) platform designed specifically to  
227 study the role of electrotaxis and other electrical phenomena in wound healing. Unique for  
228 electrical stimulation bioreactors, our approach creates a field stimulation pattern that mimics  
229 that found in wounds *in vivo*, with the field converging at the center of the wound gap. This  
230 capability allows us to directly explore the actual healing process, rather than purely uni-  
231 directional cell migration. Therefore, our platform allows study of the *in vitro* healing process  
232 spanning initial injury, ‘first contact’ as the sides of the wound meet and, critically, post-closure  
233 behavior after the wound has healed. Using this platform and unoptimized stimulation  
234 parameters, we demonstrate ~2X acceleration of wound closure in an *in vitro* skin layer model  
235 due solely to electrotactic effects. To our knowledge, this is the first demonstration and  
236 visualization of electrotaxis itself accelerating a healing process. The stability, reproducibility,  
237 and programmability of the platform make it suitable to deeply explore key technological and  
238 biological questions, and we have taken care to ensure the device is easily replicable and  
239 accessible to a broad audience.

240  
241 That even naïve stimulation had a strong, positive effect on *in vitro* healing is encouraging, and  
242 establishes a clear baseline against which future parameter optimization studies can be  
243 compared. This approach could be critical to the field as standardization and optimization of  
244 stimulation approaches remains an open question. To hint at this, we explored the effects of  
245 stimulating beyond initial closure of the wound by electrically stimulating a closed tissue, and  
246 the resulting cellular pile-up indicates both the potency of electrotaxis to drive migration and the  
247 importance of being able to fine-tune and intelligently adjust stimulation in practice to avoid  
248 detrimental effects of overstimulation. Such cellular pile-ups also speak more fundamentally to  
249 the role of electrotaxis as a tool to modulate and explore interactions at the boundaries between  
250 tissues.

251  
252 While we specifically investigated healing in monolayers of primary skin cells here, wound  
253 healing *in vivo* clearly involves complex coordination across multiple cell types (e.g.  
254 macrophages and immune cells, fibroblasts, and vascular cells, and epidermal cells) and phases,  
255 (e.g inflammation, granulation, and re-epithelialization) (2). That our platform supports pre-

256 engineering tissue configurations means that co-cultures or more complex tissue models can be  
257 grown first and then incorporated into the bioreactor to allow more complex studies on healing.  
258 When linked to stimulation optimization approaches, it may be possible to determine modalities  
259 that preferentially target a given cell type, or process such as proliferation vs. migration during  
260 healing. Again, these questions benefit from a field geometry that enables a healing phenotype.

261  
262 Finally, our bioelectric ‘Healing-on-a-Chip’ approach is fully open and intended to be modified  
263 and tailored for a variety of applications. We provide complete design files, computational  
264 models, and stimulation code (Provided via a GitHub repository:

265 <https://github.com/CohenLabPrinceton/SCHEEPDOG>), and the basic approach lends itself to  
266 easy customization. For instance, electrode shape, size, number, and location can easily be  
267 adjusted without additional cost or significant complexity. Field stimulation strategies can be  
268 tested by attaching any desired power supplies or running arbitrary stimulation code to activate  
269 electrode sequences. Our autofluorescence alignment approach makes it possible to accurately  
270 align a given electrode configuration to a given wound and removes much of the ambiguity and  
271 difficulty this process would normally introduce. We hope the demonstrations here and  
272 flexibility of the device can help accelerate healing-on-a-chip research, improve translation for  
273 future *in vivo* applications, and even support new, research on general interactions between  
274 colliding tissues.

275

## 276 **Acknowledgements**

277 We gratefully acknowledge Prof. Danelle Devenport and Katie Little at Princeton University for  
278 providing primary keratinocytes and culture support. Research reported in this publication was  
279 supported by the National Center for Advancing Translational Sciences (NCATS), a component  
280 of the National Institute of Health (NIH) under award number TL1TR003019 (TJZ). Further  
281 support was provided by National Institutes of Health grant R35GM13357401 (DJC, GS). The  
282 content is solely the responsibility of the authors and does not necessarily represent the official  
283 views of the National Institutes of Health.

## 284 **References**

- 285 1. Bois-Reymond E du. Untersuchungen uber thierische Electricitat. Berlin, Reimer. 1848;1.
- 286 2. Tai G, Tai M, Zhao M. Electrically stimulated cell migration and its contribution to wound  
287 healing. *Burns & trauma*. Narnia; 2018;6(1).
- 288 3. Anderson CA, Hare MA, Perdrizet GA. Wound healing devices brief vignettes. *Advances*  
289 *in wound care*. Mary Ann Liebert, Inc. 140 Huguenot Street, 3rd Floor New Rochelle, NY  
290 10801 USA; 2016;5(4):185–190.
- 291 4. Hunckler J, De Mel A. A current affair: electrotherapy in wound healing. *Journal of*  
292 *multidisciplinary healthcare*. Dove Press; 2017;10:179.
- 293 5. Long Y, Wei H, Li J, Yao G, Yu B, Ni D, et al. Effective Wound Healing Enabled by  
294 Discrete Alternative Electric Fields from Wearable Nanogenerators. *ACS Nano*.  
295 2018;12(12):12533–12540.
- 296 6. Liang Y, Tian H, Liu J, Lv YL, Wang Y, Zhang JP, et al. Application of stable continuous  
297 external electric field promotes wound healing in pig wound model. *Bioelectrochemistry*  
298 [Internet]. Elsevier LTD; 2020;135:107578. Available from:  
299 <https://doi.org/10.1016/j.bioelechem.2020.107578>
- 300 7. Jang HK, Oh JY, Jeong GJ, Lee TJ, Im GB, Lee JR, et al. A disposable photovoltaic patch  
301 controlling cellular microenvironment for wound healing. *International Journal of*  
302 *Molecular Sciences*. 2018;19(10).
- 303 8. Kai H, Yamauchi T, Ogawa Y, Tsubota A, Magome T, Miyake T, et al. Accelerated  
304 Wound Healing on Skin by Electrical Stimulation with a Bioelectric Plaster. *Advanced*  
305 *Healthcare Materials*. 2017;6(22):1–5.
- 306 9. Yu C, Xu ZX, Hao YH, Gao YB, Yao BW, Zhang J, et al. A novel microcurrent dressing  
307 for wound healing in a rat skin defect model. *Military Medical Research* [Internet].  
308 *Military Medical Research*; 2019;6(1):1–9. Available from:  
309 <https://mmrjournal.biomedcentral.com/track/pdf/10.1186/s40779-019-0213-x>
- 310 10. Wang X-F, Li M-L, Fang Q-Q, Zhao W-Y, Lou D, Hu Y-Y, et al. Flexible electrical  
311 stimulation device with Chitosan-Vaseline® dressing accelerates wound healing in  
312 diabetes. *Bioactive materials*. Elsevier; 2020;6(1):230–243.
- 313 11. Zajdel TJ, Shim G, Wang L, Rossello-Martinez A, Cohen DJ. SCHEEPDOG:  
314 Programming Electric Cues to Dynamically Herd Large-Scale Cell Migration. *Cell*  
315 *Systems* [Internet]. Elsevier Inc.; 2020;10(6):506–514.e3. Available from:  
316 <https://doi.org/10.1016/j.cels.2020.05.009>
- 317 12. Cohen DJ, Nelson WJ, Maharbiz MM. Galvanotactic control of collective cell migration in  
318 epithelial monolayers. *Nature materials*. Nature Publishing Group; 2014;13(4):409–417.
- 319 13. Gokoffski KK, Jia X, Shvarts D, Xia G, Zhao M. Physiologic electrical fields direct retinal  
320 ganglion cell axon growth in vitro. *Investigative ophthalmology & visual science*. The  
321 Association for Research in Vision and Ophthalmology; 2019;60(10):3659–3668.
- 322 14. Padula WV, Delarmente BA. The national cost of hospital-acquired pressure injuries in the  
323 United States. *International Wound Journal*. 2019;16(3):634–640.
- 324 15. Martinengo L, Olsson M, Bajpai R, Soljak M, Upton Z, Schmidtchen A, et al. Prevalence  
325 of chronic wounds in the general population: systematic review and meta-analysis of  
326 observational studies. *Annals of epidemiology*. Elsevier; 2019;29:8–15.
- 327 16. Morris C. Bio-electrical stimulation therapy using POSiFECT®RD. *Wounds UK*.  
328 2006;2(4):112–116.

- 329 17. Kloth LC. Electrical Stimulation Technologies for Wound Healing. *Advances in Wound*  
330 *Care*. 2014;3(2):81–90.
- 331 18. Kim H, Izadjoo M. Antibiofilm efficacy evaluation of a bioelectric dressing in mono-and  
332 multi-species biofilms. *Journal of wound care*. MA Healthcare London;  
333 2015;24(Sup2):S10–S14.
- 334 19. Kim H, Park S, Housler G, Marcel V, Cross S, Izadjoo M. An overview of the efficacy of a  
335 next generation electroceutical wound care device. *Military Medicine*. Oxford University  
336 Press; 2016;181(suppl\_5):184–190.
- 337 20. Zhao Z, Zhu K, Li Y, Zhu Z, Pan L, Pan T, et al. Optimization of Electrical Stimulation for  
338 Safe and Effective Guidance of Human Cells. *Bioelectricity*. Mary Ann Liebert, Inc.,  
339 publishers 140 Huguenot Street, 3rd Floor New ...; 2020;
- 340 21. Khouri C, Kotzki S, Roustit M, Blaise S, Gueyffier F, Cracowski J-L. Hierarchical  
341 evaluation of electrical stimulation protocols for chronic wound healing: An effect size  
342 meta-analysis. *Wound Repair and Regeneration*. Wiley Online Library; 2017;25(5):883–  
343 891.
- 344 22. Isseroff RR, Dahle SE. Electrical stimulation therapy and wound healing: where are we  
345 now? *Advances in wound care*. Mary Ann Liebert, Inc. 140 Huguenot Street, 3rd Floor  
346 New Rochelle, NY 10801 USA; 2012;1(6):238–243.
- 347 23. Kloth LC. Electrical stimulation for wound healing: a review of evidence from in vitro  
348 studies, animal experiments, and clinical trials. *The international journal of lower extremity*  
349 *wounds*. Sage Publications Sage CA: Thousand Oaks, CA; 2005;4(1):23–44.
- 350 24. Ashrafi M, Alonso-Rasgado T, Baguneid M, Bayat A. The efficacy of electrical  
351 stimulation in lower extremity cutaneous wound healing: a systematic review.  
352 *Experimental dermatology*. Wiley Online Library; 2017;26(2):171–178.
- 353 25. Zhang B, Korolj A, Lai BFL, Radisic M. Advances in organ-on-a-chip engineering. *Nature*  
354 *Reviews Materials*. Nature Publishing Group; 2018;3(8):257–278.
- 355 26. Wang Z, Samanipour R, Koo K, Kim K. Organ-on-a-chip platforms for drug delivery and  
356 cell characterization: A review. *Sens. Mater*. 2015;27(6):487–506.
- 357 27. Zhang B, Radisic M. Organ-on-a-chip devices advance to market. *Lab on a Chip*. Royal  
358 Society of Chemistry; 2017;17(14):2395–2420.
- 359 28. McCaig CD, Song B, Rajnicek AM. Electrical dimensions in cell science. *Journal of cell*  
360 *science*. The Company of Biologists Ltd; 2009;122(23):4267–4276.
- 361 29. Cortese B, Palama IE, D’Amone S, Gigli G. Influence of electrotaxis on cell behaviour.  
362 *Integrative Biology*. Oxford University Press; 2014;6(9):817–830.
- 363 30. Kennard AS, Theriot JA. Osmolarity-independent electrical cues guide rapid response to  
364 injury in zebrafish epidermis. *Elife*. eLife Sciences Publications Limited; 2020;9:e62386.
- 365 31. Allen GM, Mogilner A, Theriot JA. Electrophoresis of cellular membrane components  
366 creates the directional cue guiding keratocyte galvanotaxis. *Current Biology*. Elsevier;  
367 2013;23(7):560–568.
- 368 32. Wahlsten O, Skiba JB, Makin IRS, Apell SP. Electrical field landscape of two  
369 electroceuticals. *Journal of Electrical Bioimpedance*. 2016;7(1):13–19.
- 370 33. Shen Y, Pfluger T, Ferreira F, Liang J, Navedo MF, Zeng Q, et al. Diabetic cornea wounds  
371 produce significantly weaker electric signals that may contribute to impaired healing.  
372 *Scientific Reports [Internet]*. 2016;6(June):1–12. Available from:  
373 <https://www.nature.com/articles/srep26525.pdf>

- 374 34. McCaig CD, Rajniecek AM, Song B, Zhao M. Controlling cell behavior electrically: current  
375 views and future potential. *Physiological reviews*. American Physiological Society; 2005;
- 376 35. Heinrich MA, Alert R, LaChance JM, Zajdel TJ, Košmrlj A, Cohen DJ. Size-dependent  
377 patterns of cell proliferation and migration in freely-expanding epithelia. Rosenblatt J,  
378 Stainier DY, Kabla A, editors. *eLife* [Internet]. eLife Sciences Publications, Ltd; 2020  
379 Aug;9:e58945. Available from: <https://doi.org/10.7554/eLife.58945>
- 380 36. Schopf A, Boehler C, Asplund M. Analytical methods to determine electrochemical factors  
381 in electrotaxis setups and their implications for experimental design. *Bioelectrochemistry*.  
382 Elsevier; 2016;109:41–48.
- 383 37. Li M, Wang X, Rajagopalan P, Zhang L, Zhan S, Huang S, et al. Toward Controlled  
384 Electrical Stimulation for Wound Healing Based on a Precision Layered Skin Model. *ACS*  
385 *Applied Bio Materials*. ACS Publications; 2020;
- 386 38. Ream RA, Theriot JA, Somero GN. Influences of thermal acclimation and acute  
387 temperature change on the motility of epithelial wound-healing cells (keratocytes) of  
388 tropical, temperate and Antarctic fish. *Journal of experimental biology*. The Company of  
389 Biologists Ltd; 2003;206(24):4539–4551.
- 390 39. Zhao M. Electrical fields in wound healing—an overriding signal that directs cell  
391 migration. *Seminars in cell & developmental biology*. Elsevier; 2009. p. 674–682.
